# Supplementary material for: EG-Assisted hand-in-hand growth of prism-like Cu2O nanorods with high aspect ratios and their thermal conductive performance
Source: Royal Society of Chemistry journal article supplement (doi:10.1039/c4ra03480e), 2014-01-01
Supplement: c4ra03480e1.pdf [file c4ra03480e1.pdf]

Electronic Supplementary Material (ESI) for RSC Advanced.

This journal is © The Royal Society of Chemistry 2014

Electronic Supplementary Information For

**EG-Assisted Hand-in-Hand Growth of Prism-like  $\text{Cu}_2\text{O}$  Nanorods with High Aspect Ratios and Their Thermal Conductive Performance**

JingchaoZhu<sup>†</sup>, YangShang<sup>†</sup>, Xiaobo Sun\* and Lin Guo\*

*School of Chemistry and Environment, Beihang University, Beijing 100191, PR China*

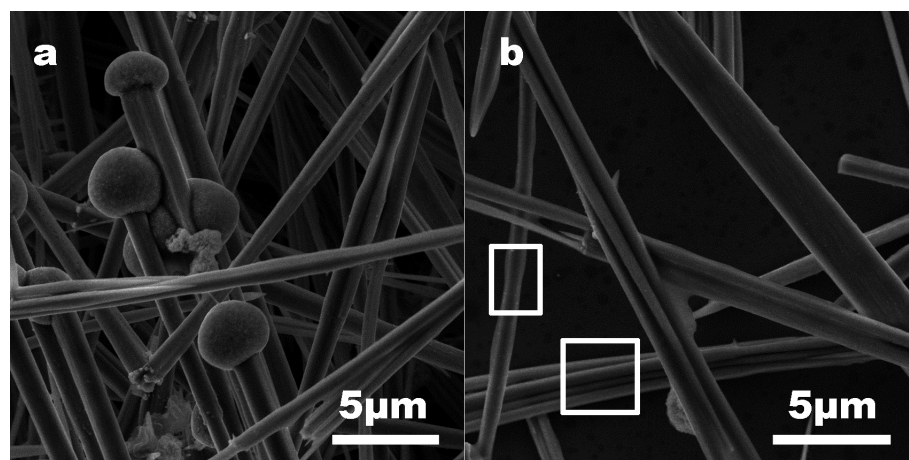

**Figure S1.** SEM images of the intermediate products collect at (a) 12, (b) 16h

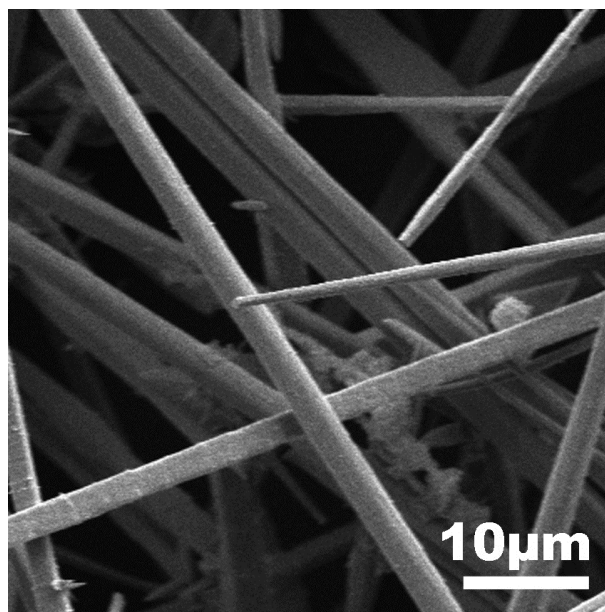

**Figure S2.** SEM images of the products collect at 48h

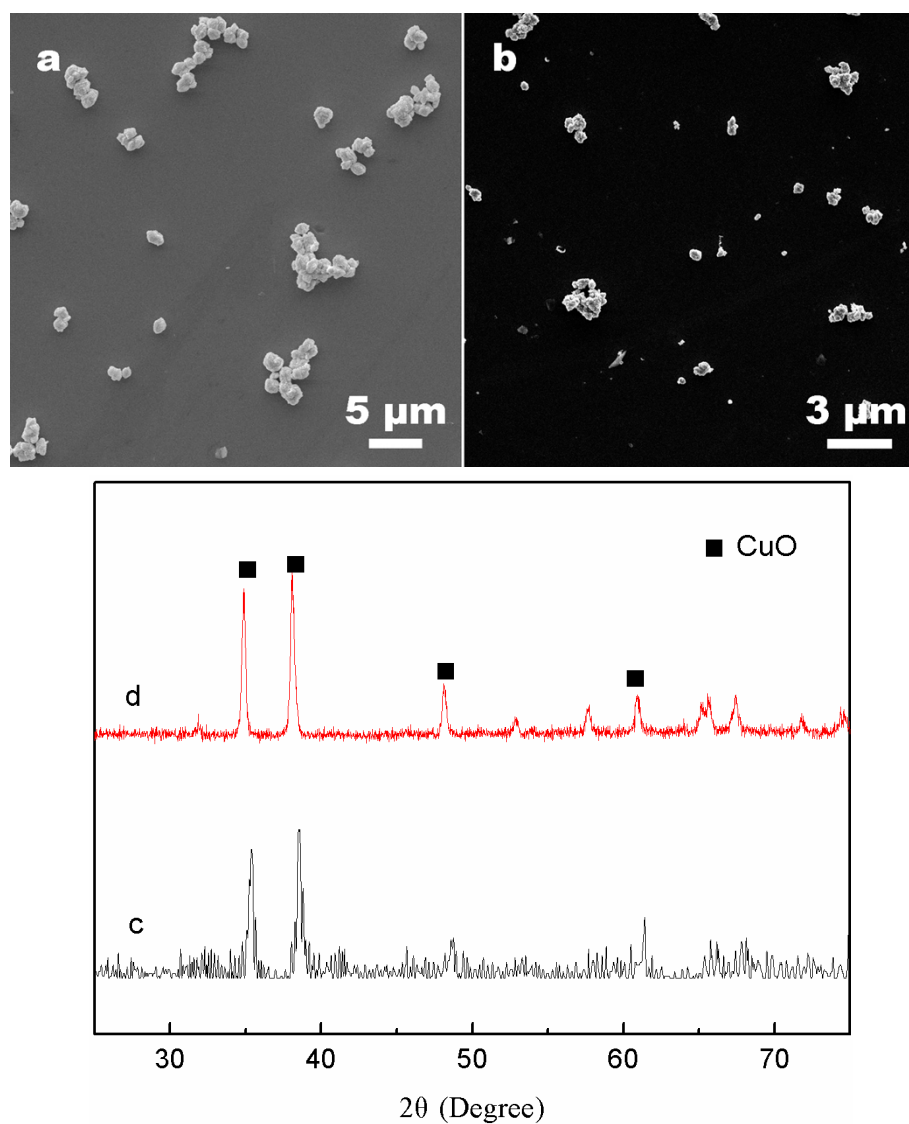

**Figure S3.** SEM images of the product obtained at 140°C for 24 h in the presence of (a) 0  $\mu\text{L}$  LPy and 0  $\mu\text{L}$  EG, (b) 0  $\mu\text{L}$  LPy and 250  $\mu\text{L}$  EG, (c) XRD pattern of product (a), (d) XRD pattern of product (b).

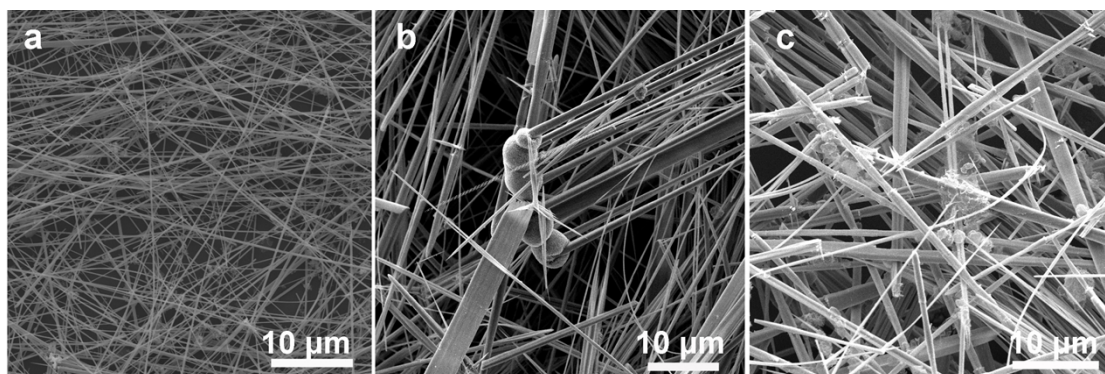

**Figure S4.** SEM images of 1D  $\text{Cu}_2\text{O}$  nanostructures obtained at  $140^\circ\text{C}$  for 24 h in the present of  $22\ \mu\text{L}$  Py and different amount of EG: (a)  $0\ \mu\text{L}$ ; (b)  $50\ \mu\text{L}$ ; (c)  $150\ \mu\text{L}$ .

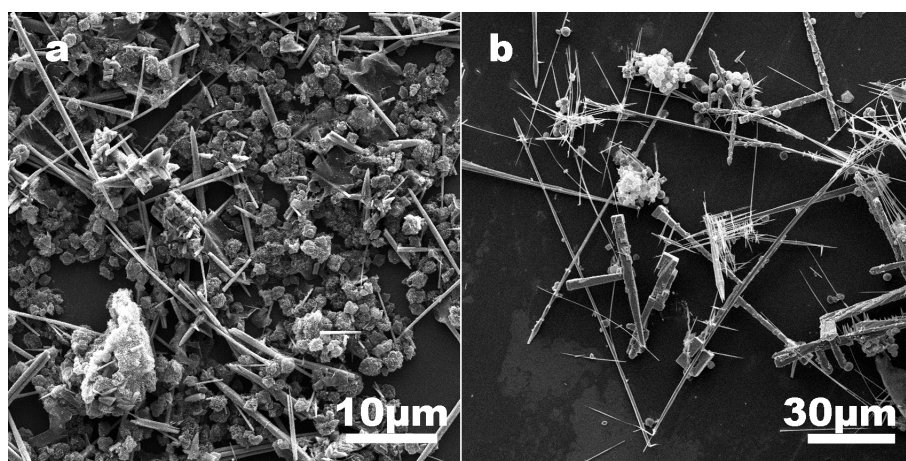

**Figure S5.** SEM images of  $\text{Cu}_2\text{O}$  nanostructures obtained at different temperature. (a)  $120^\circ\text{C}$ , (b)  $160^\circ\text{C}$ .

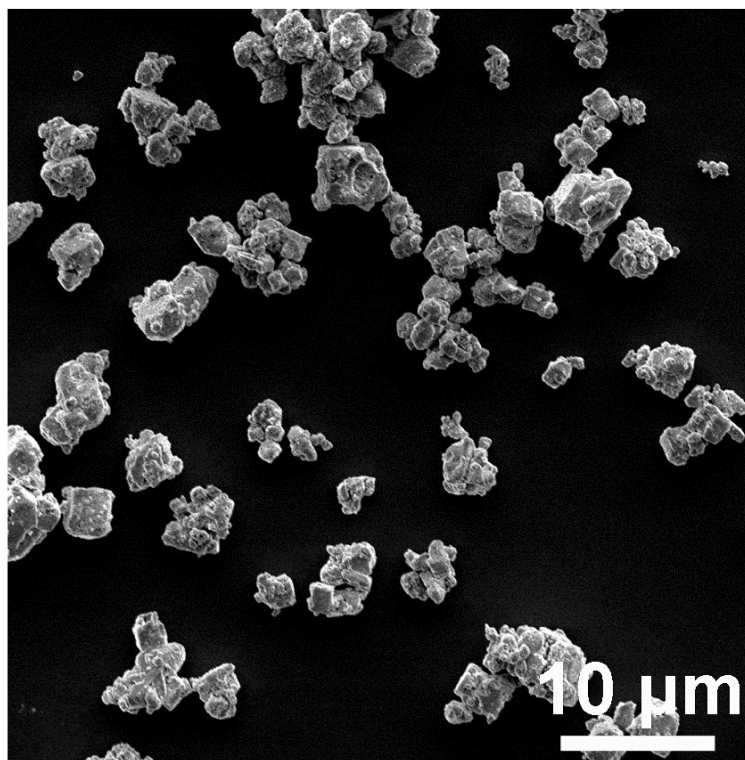

**Fig. S6**SEM image of commercial  $\text{Cu}_2\text{O}$  cubes with size about  $2.5\text{ }\mu\text{m}$ .

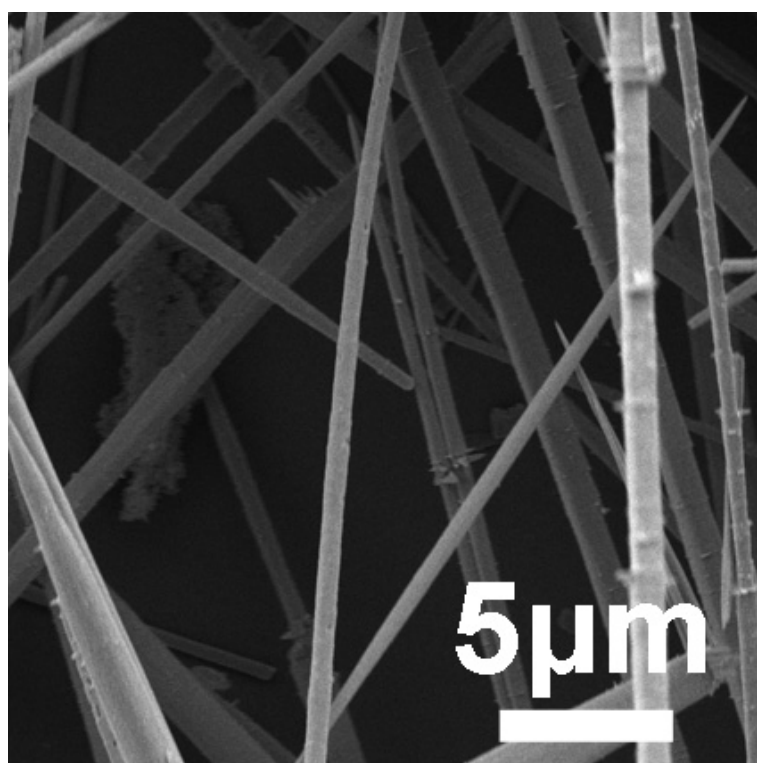

**Fig. S7**SEM image of  $\text{Cu}_2\text{O}$  morphology after grinding
